# Supplementary material for: Spatial genetic structure and diversity of natural populations of Aesculus hippocastanum L. in Greece
Source: PLoS One. 2019 Dec 11;14(12):e0226225. doi: 10.1371/journal.pone.0226225 (PMC6905551; doi:10.1371/journal.pone.0226225)
Supplement: S1 Table — Coordinates for populations from Peçi et al. (2012) are approximate. (XLSX) [file pone.0226225.s011.xlsx]

## Sheet: Arkusz1
N	Population	Country	Latitude (North)	Longitude (East)	Annual mean temperature [°C]	Mean diurnal range of temperature [°C]	Isothermality [%]	Temperature seasonality [standard deviation x 100)	Maximium temperature of warmest month [°C]	Minimum temperature of coldest month [°C]	Tempreature annual range [°C]	Mean temperature of wettest quarter [°C]	Mean temperature of driest quarter [°C]	Mean temperature of warmest quarter [°C]	Mean temperature of coldest quarter [°C]	Annual precipitation [mm]	Precipitation of wettest month [mm]	Precipitation of driest month [mm]	Precipitation seasonality [%]	Precipitation of wettest quarter [mm]	Precipitation of driest quarter [mm]	Precipitation of warmest quarter [mm]	Precipitation of coldest quarter [mm]	References
1	Bënçë	Albania	40.3335	19.8108	10.2	8.7	34	5855	24.4	-0.9	25.3	4.4	17.9	17.9	3.1	1161	169	34	45	466	118	118	417	Peçi et al. 2012
2	Bozhiq- Bishnicë	Albania	40.8933	20.4333	8.1	9.4	34	6181	23.2	-4.2	27.4	4.9	16.1	16.1	0.3	1015	134	46	31	354	146	146	310	Valade et al. 2009
3	Çajup[i]-Zhej. Lunxheriës	Albania	40.2072	20.1994	9.1	9.2	34	6051	24.1	-2.7	26.8	3	17	17.0	1.6	1130	161	37	43	444	122	122	397	Lees et al. 2011
4	Çikës	Albania	40.2227	19.5456	9.3	8.1	33	5771	23	-1.4	24.4	3.7	16.8	16.8	2.3	1145	166	34	45	457	119	119	408	Peçi et al. 2012
5	Devollbridge. Schlucht near Tresova	Albania	40.7342	20.5786	10.2	10	34	6397	26.1	-2.6	28.7	6.7	18.5	18.5	2.2	918	123	41	33	328	126	126	275	Lees et al. 2011
6	Griba. Südlich Sevaster	Albania	40.3818	19.7282	11.3	8.6	33	5828	25.3	0	25.3	5.5	18.9	18.9	4.2	1159	172	31	47	472	112	112	422	Lees et al. 2011
7	Kardhiq	Albania	40.0942	20.0632	7.1	8.8	33	5960	21.8	-4.1	25.9	1.3	15	15.0	-0.1	1148	159	40	41	445	132	132	400	Peçi et al. 2012
8	Mali i Gjer. Delvina-Palohori	Albania	39.9870	20.0750	13.2	9.5	35	6092	28.3	1.2	27.1	7	21.2	21.2	5.7	1395	231	22	61	636	86	86	592	Lees et al. 2011
9	Mount Dhëmbel	Albania	40.2371	20.2319	9.8	9.4	34	6111	25	-2.1	27.1	3.6	17.8	17.8	2.3	1134	163	36	44	449	119	119	402	Peçi et al. 2012
10	Mount Nemërçkë	Albania	40.0894	20.4439	4.8	8.9	33	6051	19.8	-6.6	26.4	-1.1	12.7	12.7	-2.6	1116	145	46	36	414	147	147	376	Peçi et al. 2012
11	Mt Tomor. Sotir[ë]	Albania	40.7552	20.1663	12.3	9.4	34	6199	27.4	0.1	27.3	5.9	20.4	20.4	4.6	1065	150	36	39	403	124	124	360	Lees et al. 2011
12	Progonat	Albania	40.2380	19.8761	10.8	8.8	34	5912	25.3	-0.5	25.8	5	18.6	18.6	3.6	1188	176	31	48	489	111	111	440	Peçi et al. 2012
13	Stravaj	Albania	41.1042	20.3646	8.7	9.4	34	6195	23.7	-3.6	27.3	2.4	16.7	16.7	0.9	1039	137	46	32	363	148	148	320	Peçi et al. 2012
14	Stravaj. librazhd	Albania	40.9906	20.4254	9.4	9.6	34	6259	24.7	-3	27.7	6.1	17.5	17.5	1.6	995	132	44	32	349	140	140	305	Valade et al. 2009
15	Tepelen[ë]	Albania	40.2585	20.0378	14.4	9.5	35	6115	29.3	2.2	27.1	8.1	22.4	22.4	6.8	1373	226	22	60	622	88	88	582	Lees et al. 2011
16	Tropoje	Albania	42.3698	19.8649	7.3	8.5	31	6514	21.8	-5.3	27.1	0.3	15.5	15.5	-1.1	1213	144	66	22	392	213	213	351	Peçi et al. 2012
17	Agrafa. Korona	Greece	39.1300	21.6120	10.8	10.8	36	6592	27.8	-2.2	30	4	19.3	19.3	2.6	907	132	23	46	361	95	95	345	Lees et al. 2011
18	Chaliki	Greece	39.6820	21.1890	9.6	10.6	35	6551	26.4	-3.3	29.7	2.8	18.1	18.1	1.3	935	124	31	40	357	112	112	326	Lees et al. 2011
19	Dasorema-Desi Kolovogianni	Greece	38.7286	22.0863	10.0	10.6	36	6517	26.8	-2.6	29.4	3.5	18.2	18.5	2.0	885	133	21	48	361	86	90	350	Avtzis et al. 2007
20	Dasos Nanitsa	Greece	39.7063	21.3761	9.0	10.7	35	6631	26	-4	30	2.1	17.6	17.6	0.7	885	114	31	37	327	114	114	299	Avtzis et al. 2007
21	Dragasia-Gravalo Pezouli-Megali Ondria	Greece	40.3324	21.1076	7.4	10.2	34	6491	23.7	-5.5	29.2	4	15.8	15.8	-0.8	872	110	40	30	299	131	131	262	Avtzis et al. 2007
22	Gavroneri. Stomio	Greece	39.8697	22.6804	14.9	11.2	34	7208	32.5	0.4	32.1	11.3	23.8	24.3	5.8	468	57	17	30	162	68	71	139	Avtzis et al. 2007
23	Gefira Papakou. Karitsa	Greece	39.8496	22.7230	12.1	10.8	34	7068	29.4	-1.7	31.1	4.8	20.8	21.3	3.2	558	67	22	29	188	80	89	172	Avtzis et al. 2007
24	Geka. Melivia	Greece	39.8098	22.7731	12.4	10.8	34	7055	29.7	-1.5	31.2	5.2	21.1	21.6	3.6	551	67	21	30	187	78	86	172	Avtzis et al. 2007
25	Gomarolakas-Asfalto	Greece	39.8457	22.7175	12.1	10.8	34	7068	29.4	-1.7	31.1	4.8	20.8	21.3	3.2	558	67	22	29	188	80	89	172	Avtzis et al. 2007
26	Gomarolakas-Evrimenon	Greece	39.8342	22.7275	11.2	10.7	34	6999	28.4	-2.5	30.9	4.1	19.9	20.4	2.5	589	71	23	29	200	84	94	184	Avtzis et al. 2007
27	Inter Chaliki et Krania	Greece	39.6300	21.2400	10.4	10.8	35	6612	27.4	-2.8	30.2	3.4	18.9	18.9	2.0	921	125	28	41	354	106	106	326	Lees et al. 2011
28	Kakoskali	Greece	39.8002	22.7787	12.4	10.8	34	7056	29.8	-1.3	31.1	5.2	21.2	21.7	3.6	552	68	21	30	188	78	86	173	Avtzis et al. 2007
29	Kakoskali. Melivia	Greece	39.7999	22.7806	11.5	10.7	34	7006	28.7	-2.2	30.9	4.3	20.2	20.6	2.7	585	72	22	30	200	82	91	185	Avtzis et al. 2007
30	Kalliroi. Koukoufli	Greece	39.6208	21.3035	10.4	10.9	35	6658	27.6	-2.8	30.4	3.4	19.1	19.1	2.0	901	122	28	40	344	106	106	317	Avtzis et al. 2007
31	Kalomoira. Paliochori	Greece	39.7512	21.4179	12.6	11.5	35	6994	30.5	-1.5	32	5	21.6	21.6	3.7	811	111	24	39	301	96	96	284	Avtzis et al. 2007
32	Karitsa	Greece	39.8260	22.7430	11.1	10.6	34	6975	28.3	-2.5	30.8	4	19.8	20.2	2.4	592	72	23	29	201	84	94	186	Lees et al. 2011
33	Karitsa I (Arkoudopouri. Meliva)	Greece	39.8146	22.7661	12.0	10.7	34	7033	29.3	-1.8	31.1	4.8	20.7	21.2	3.2	566	69	22	30	192	80	89	177	Avtzis et al. 2007
34	Karitsa II	Greece	39.8397	22.7381	11.5	10.7	34	7021	28.7	-2.3	31	4.3	20.2	20.6	2.7	581	70	23	29	196	83	93	180	Lees et al. 2011
35	Karitsa III	Greece	39.8490	22.7220	12.1	10.8	34	7068	29.4	-1.7	31.1	4.8	20.8	21.3	3.2	558	67	22	29	188	80	89	172	Lees et al. 2011
36	Karitsa IV	Greece	39.8500	22.7270	14.1	11.1	34	7143	31.6	-0.2	31.8	10.6	22.9	23.4	5.1	494	60	18	30	168	71	76	149	Lees et al. 2011
37	Karitsa V	Greece	39.8440	22.7250	12.4	10.9	34	7067	29.7	-1.6	31.3	5	21.1	21.5	3.5	549	66	21	30	185	79	87	169	Lees et al. 2011
38	Karitsa VI	Greece	39.8500	22.7300	14.1	11.1	34	7143	31.6	-0.2	31.8	10.6	22.9	23.4	5.1	494	60	18	30	168	71	76	149	Lees et al. 2011
39	Katavothra-Evrimenon	Greece	39.8391	22.7097	11.1	10.7	34	6991	28.3	-2.6	30.9	4	19.7	20.2	2.3	594	72	23	29	201	84	95	186	Avtzis et al. 2007
40	Kechriá	Greece	39.8380	22.7466	12.1	10.8	34	7040	29.3	-1.7	31	4.8	20.8	21.2	3.3	559	68	22	30	189	80	89	173	Lees et al. 2011
41	Kranea-Milea	Greece	39.8791	21.2496	9.1	10.7	35	6617	26.1	-4	30.1	2.2	17.8	17.8	0.8	881	113	33	36	322	116	116	290	Avtzis et al. 2007
42	Kritharia 2-Mikri Ondria	Greece	40.3377	21.0924	7.3	10.2	34	6477	23.6	-5.6	29.2	3.9	15.7	15.7	-0.9	876	111	41	30	301	132	132	264	Avtzis et al. 2007
43	Lake Plastira	Greece	39.2285	21.7307	9.3	10.7	35	6607	26.2	-3.6	29.8	2.6	17.5	17.9	1.0	890	124	26	42	344	101	104	326	Avtzis et al. 2007
44	Malakasi-Routzi	Greece	39.7739	21.2547	10.4	10.9	35	6683	27.6	-2.9	30.5	3.3	19	19.0	1.9	888	117	29	39	334	108	108	304	Avtzis et al. 2007
45	Marathos	Greece	39.0835	21.6201	11.9	11	36	6648	29.1	-1.2	30.3	5	20.5	20.5	3.6	898	134	21	47	361	89	89	347	Avtzis et al. 2007
46	Mariolata Forest - Efkero Sakkouli	Greece	38.6292	22.4427	11.8	10.7	36	6577	28.7	-0.8	29.5	5.3	20.1	20.5	3.8	802	124	17	50	328	74	79	322	Avtzis et al. 2007
47	Mariolata Forest-Rocks	Greece	38.6224	22.4229	8.8	10.4	35	6468	25.3	-3.6	28.9	2.4	16.9	17.3	0.9	881	132	22	48	358	86	93	350	Avtzis et al. 2007
48	Megali Loga. Lidoriki	Greece	38.7231	22.0840	9.8	10.6	36	6459	26.5	-2.7	29.2	3.4	18	18.3	1.9	891	134	22	48	364	87	91	352	Avtzis et al. 2007
49	Megalo Rema. Nafpaktos	Greece	38.7295	21.8689	9.5	10.5	36	6424	26.1	-2.8	28.9	3.1	17.6	17.9	1.6	932	140	23	49	382	92	93	368	Avtzis et al. 2007
50	Megalochorio. Kaliakuda	Greece	38.8146	21.7532	10.8	10.7	36	6503	27.5	-1.9	29.4	4.2	19.2	19.2	2.7	922	140	21	49	380	89	89	365	Lees et al. 2011
51	Mikro Chorio. Mt. Chelidoni	Greece	38.8290	21.7050	10.3	10.6	36	6462	27	-2.2	29.2	3.9	18.7	18.7	2.4	935	141	22	49	385	90	90	368	Lees et al. 2011
52	Monodendri	Greece	39.8940	20.7390	8.6	10	35	6313	24.7	-3.7	28.4	2.1	16.8	16.8	0.7	1034	142	37	41	400	119	119	359	Lees et al. 2011
53	Monodendri-Petrino Dasos	Greece	39.8937	20.7393	8.6	10	35	6313	24.7	-3.7	28.4	2.1	16.8	16.8	0.7	1034	142	37	41	400	119	119	359	Avtzis et al. 2007
54	Montes Timphi	Greece	39.9138	20.8512	8.8	10.2	35	6393	25.1	-3.8	28.9	2.1	17.1	17.1	0.8	996	135	36	40	380	118	118	341	Lees et al. 2011
55	Ondria (Kritharia 1-Mikri)	Greece	40.3419	21.0971	8.7	10.5	35	6605	25.4	-4.6	30	5.1	17.2	17.2	0.3	833	106	38	30	290	124	124	246	Avtzis et al. 2007
56	Pano-Kalesmenou	Greece	38.9088	21.7245	11.4	10.8	36	6536	28.2	-1.5	29.7	4.7	19.8	19.8	3.2	906	137	21	49	371	88	88	356	Avtzis et al. 2007
57	Perivoli	Greece	39.9655	21.2040	10.8	11	35	6740	28.1	-2.8	30.9	3.6	19.5	19.5	2.2	854	110	30	37	314	108	108	283	Avtzis et al. 2007
58	Platanolaka-Kalesmenou	Greece	38.9442	21.7460	10.4	10.7	36	6535	27.3	-2.3	29.6	3.9	18.7	18.9	2.3	911	135	22	47	368	92	93	353	Avtzis et al. 2007
59	Pouri Artotinas. Lidoriki	Greece	38.7169	22.0640	10.6	10.7	36	6526	27.4	-2	29.4	4.2	18.9	19.2	2.6	879	133	20	49	360	84	87	349	Avtzis et al. 2007
60	Prionia Stangogianni. Malakasi	Greece	39.7677	21.2417	9.1	10.6	35	6577	26	-3.9	29.9	2.2	17.6	17.6	0.8	904	116	32	37	336	114	114	305	Avtzis et al. 2007
61	Rema Agiou Pnevmatos. Gravia	Greece	38.7861	22.3129	8.9	10.4	35	6542	25.6	-3.6	29.2	2.4	17.1	17.5	0.9	873	128	23	46	349	89	96	340	Avtzis et al. 2007
62	Rema Skorda-Evrimenon	Greece	39.8260	22.7427	11.1	10.6	34	6975	28.3	-2.5	30.8	4	19.8	20.2	2.4	592	72	23	29	201	84	94	186	Avtzis et al. 2007
63	Syrakou	Greece	39.5940	21.1040	9.3	10.5	35	6487	26	-3.4	29.4	2.6	17.8	17.8	1.2	976	133	31	42	382	110	110	349	Lees et al. 2011
64	Tsepélovo	Greece	39.9110	20.8210	8.8	10.2	35	6381	25.1	-3.8	28.9	2.1	17.1	17.1	0.8	1006	137	36	40	386	118	118	346	Lees et al. 2011
65	Tzamia-Evrimenon	Greece	39.8363	22.7078	11.6	10.8	34	7007	28.9	-2.2	31.1	4.4	20.3	20.7	2.8	574	69	22	29	193	82	91	178	Avtzis et al. 2007
66	Vaeni-Dasos Malamouli	Greece	39.2140	21.7146	9.9	10.8	36	6638	26.9	-3.1	30	3.1	18.1	18.5	1.6	887	125	25	43	345	98	101	327	Avtzis et al. 2007
67	Vathirrevma	Greece	39.4236	21.4308	10.1	10.8	35	6613	27.2	-3	30.2	3.2	18.7	18.7	1.8	911	126	27	42	352	104	104	329	Avtzis et al. 2007
68	Vrachiotika-Mikri Ondria	Greece	40.3414	21.0964	7.3	10.2	34	6477	23.6	-5.6	29.2	3.9	15.7	15.7	-0.9	876	111	41	30	301	132	132	264	Avtzis et al. 2007
69	Vromoneri-Evrimenon	Greece	39.8444	22.7137	12.5	10.9	34	7075	29.8	-1.5	31.3	5.2	21.2	21.7	3.6	544	66	21	29	183	78	86	167	Avtzis et al. 2007
70	Drenachka Reka	North Macedonia	41.3959	20.5762	10.5	9.8	34	6578	26.2	-2.5	28.7	6.9	18.9	18.9	2.0	945	122	45	29	322	142	142	284	Smith & Smith 2003
71	Galicica National Artificial	North Macedonia	41.2067	20.9377	8.7	10.2	35	6527	24.5	-4.5	29	5.2	17	17.0	0.3	841	106	44	26	280	138	138	239	Valade et al. 2009
72	Garska Reka/Lazaropole	North Macedonia	41.5350	20.6897	6.9	9.6	34	6275	22	-5.9	27.9	0.5	14.8	14.8	-1.1	1038	133	50	29	358	162	162	317	Valade et al. 2009
73	Suvi Dol	North Macedonia	41.4732	20.8052	9.4	10	34	6591	25.2	-3.8	29	5.9	17.7	17.7	0.9	882	112	45	27	295	142	142	256	Valade et al. 2009
74	Tri Cheshmi. National Park Mavrovo	North Macedonia	41.6833	20.7000	6.1	9.3	33	6279	21.1	-6.6	27.7	-0.4	14	14.0	-2.0	1031	128	53	27	347	170	170	308	Acevski & Simovski 2012
